# Supplementary material for: Introduction of α-MnO2nanosheets to NH2graphene to remove Cr6+from aqueous solutions
Source: Royal Society of Chemistry journal article supplement (doi:10.1039/c5ra04545b), 2015-01-01
Supplement: c5ra04545b1.pdf [file c5ra04545b1.pdf]

## **Supplementary Material**

### **Adsorption isotherms, kinetics and thermodynamic**

## 1. Adsorption Isotherms

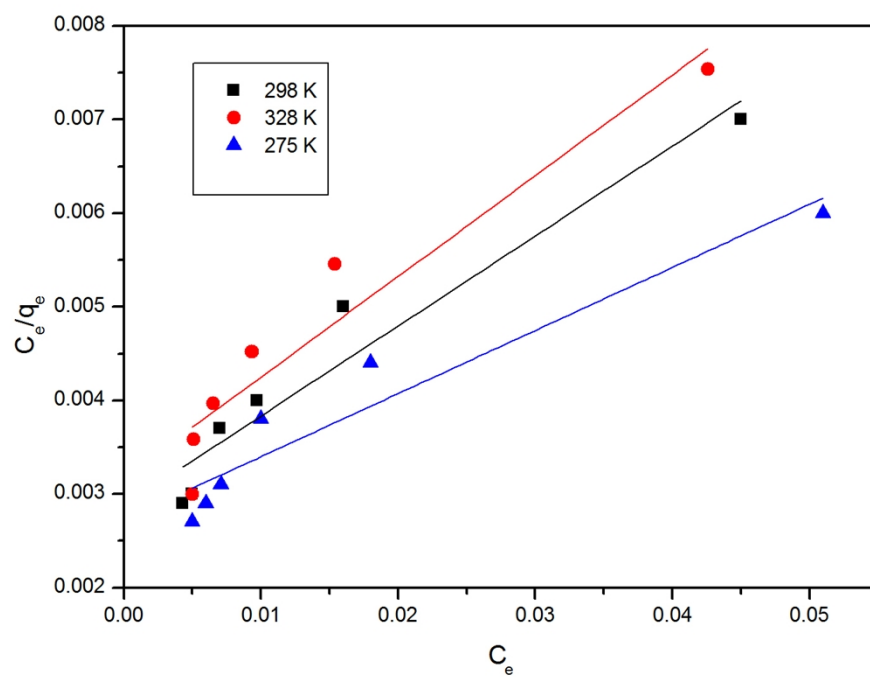

**Fig. S1** Langmuir adsorption isotherm for Cr<sup>6+</sup> adsorption onto the surface of  $\alpha$ -MnO<sub>2</sub>-NH<sub>2</sub>-RGO at different temperatures.

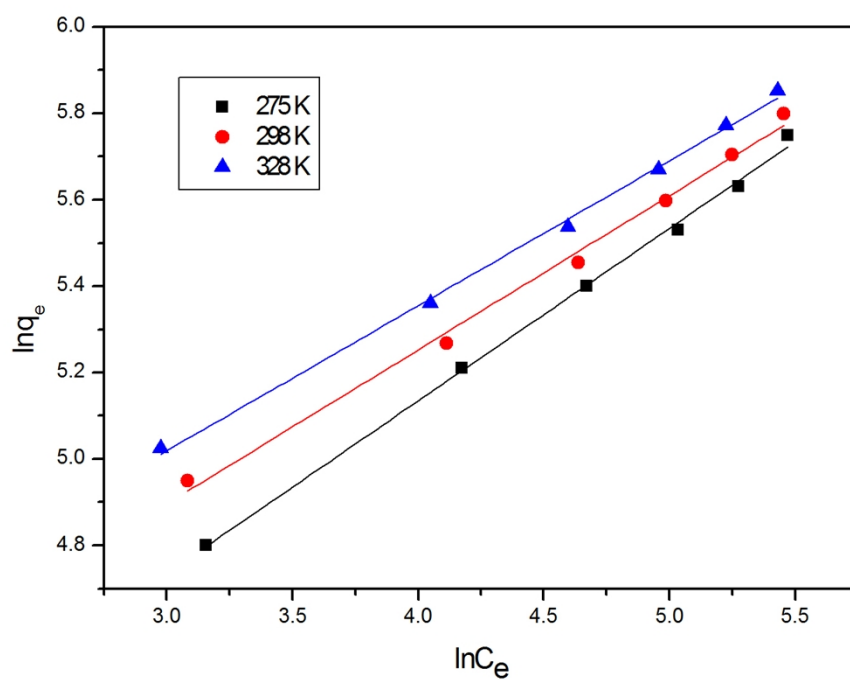

**Fig. S2.** Freundlich adsorption isotherm for  $\text{Cr}^{6+}$  adsorption onto the surface of  $\alpha\text{-MnO}_2\text{-NH}_2\text{-RGO}$  at different temperatures.

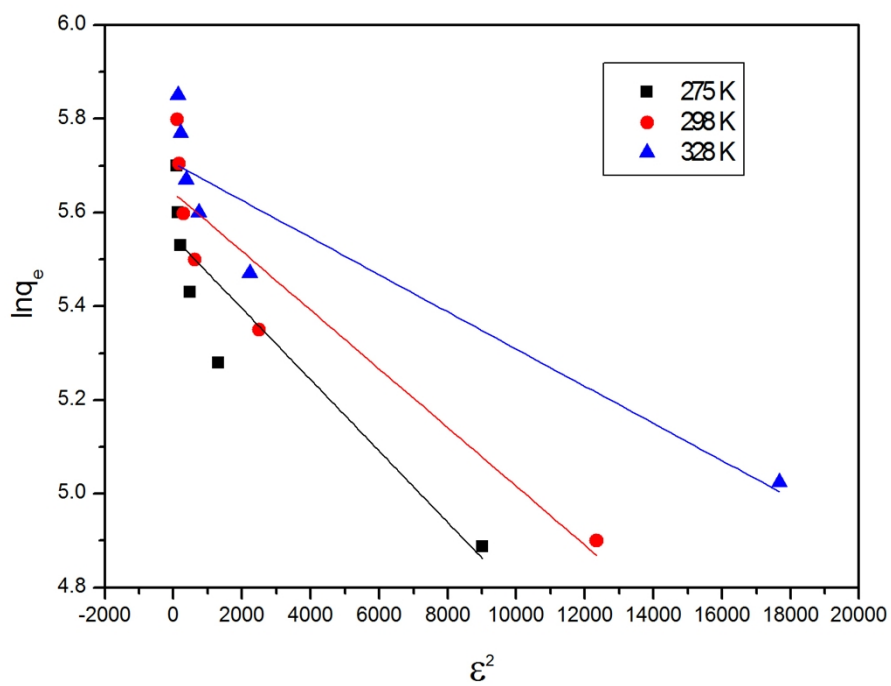

**Fig. S3.** D-R adsorption isotherm for  $\text{Cr}^{6+}$  adsorption onto the surface of  $\alpha\text{-MnO}_2\text{-NH}_2\text{-RGO}$  at different temperatures.

### 3. Adsorption Kinetics

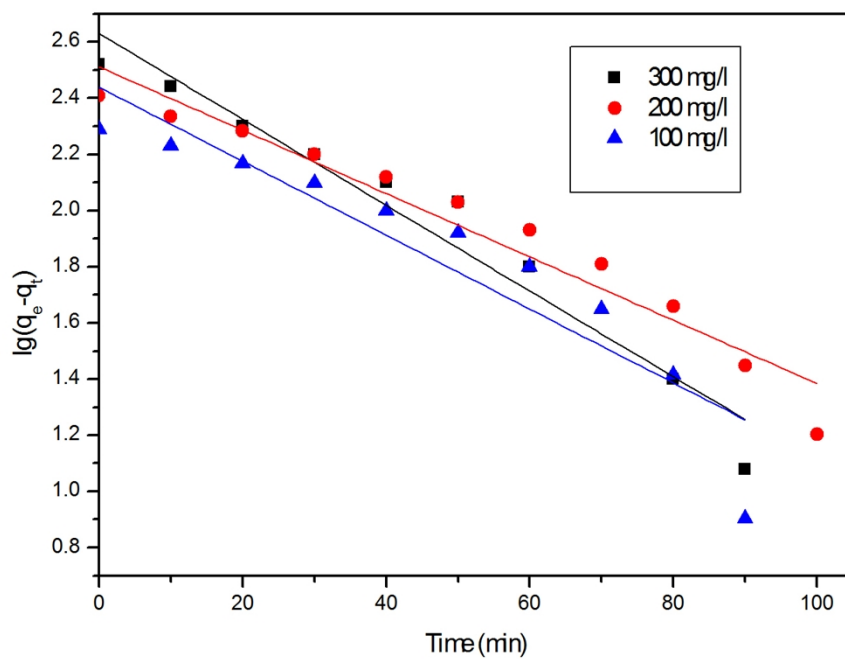

**Fig. S4.** Plot of the pseudo-first-order kinetic model for Cr<sup>6+</sup> adsorption onto the surface of  $\alpha$ -MnO<sub>2</sub>-NH<sub>2</sub>-RGO at different initial solution concentrations.

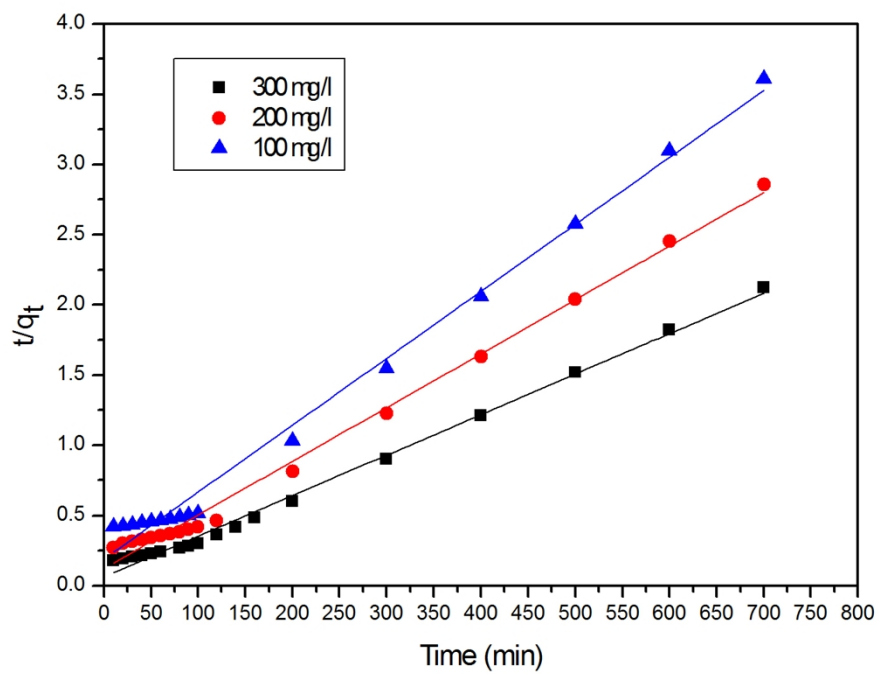

**Fig. S5.** Plot of the pseudo-second-order kinetic model for  $\text{Cr}^{6+}$  adsorption onto the surface of  $\alpha$ - $\text{MnO}_2$ - $\text{NH}_2$ -RGO at different initial solution concentrations.

#### 4. Adsorption Thermodynamic

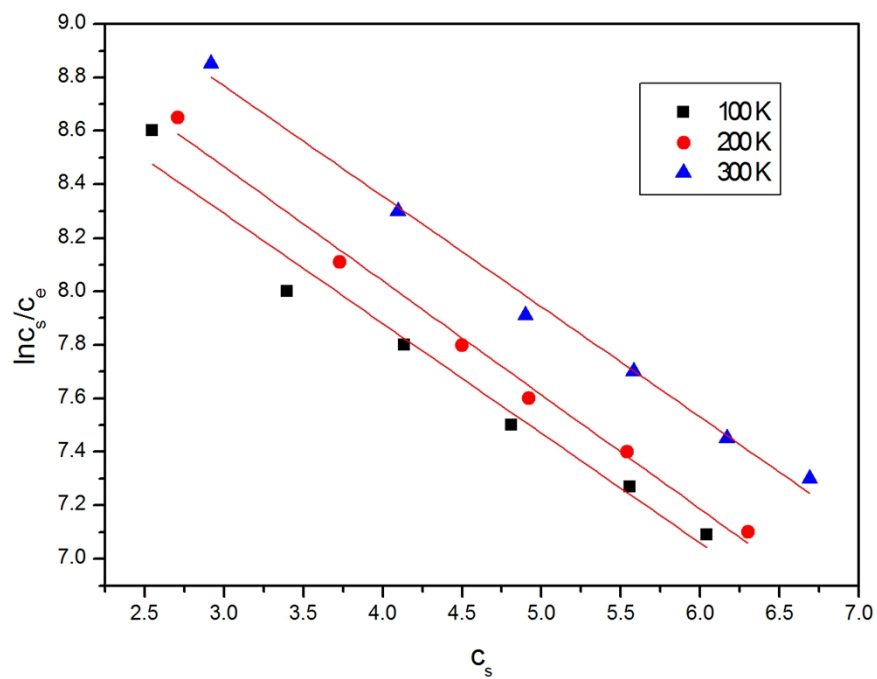

Fig. S6. Plots of  $\ln C_s/C_e$  versus  $C_s$  at various temperatures.

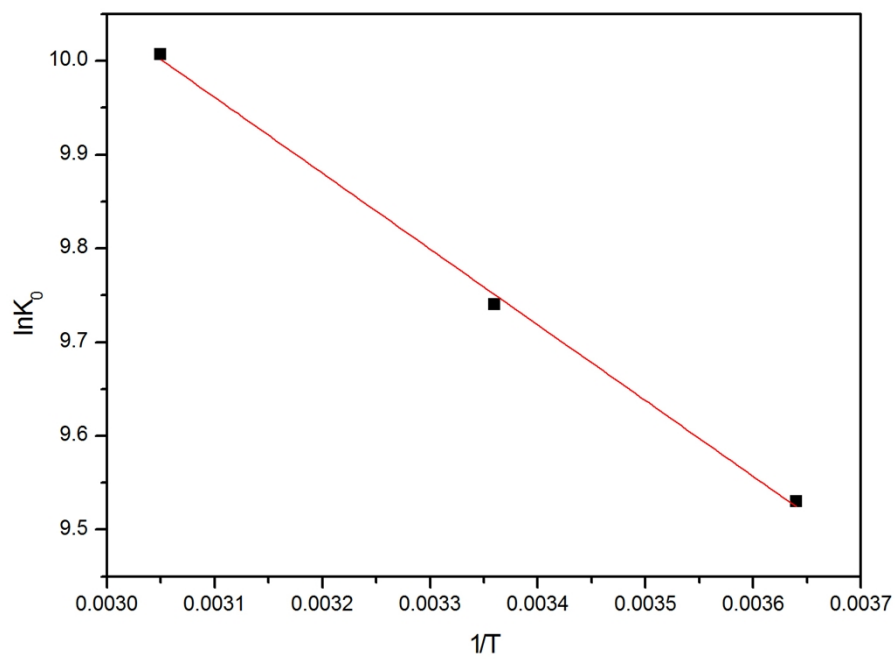

**Fig. S7.** Plots of  $\ln K_0$  versus  $1/T$



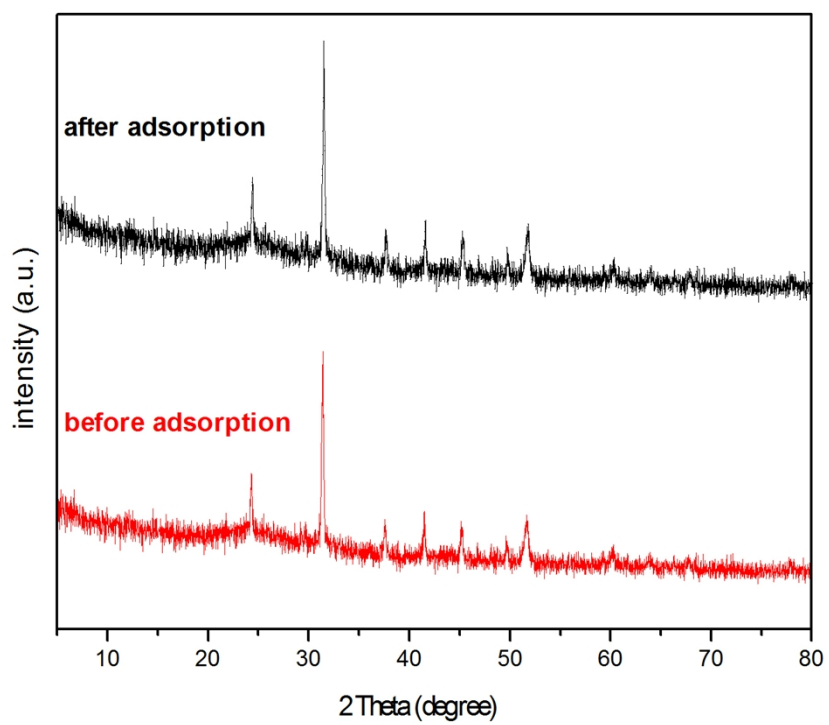

**Fig. S8.** The XRD of composite before and after adsorption
